# Supplementary material
Source: publisher figshare collection journal article supplement (https://gsajournals.figshare.com/ndownloader/files/17869265)
Supplement: Supplementary file 1 [file 17869265]

**Supplementary Information 4**

Correlations between phenotypes and cross-validated predicted BVs for the different HD SNP panel densities. The correlations increase with increasing SNP density. Across all SNP densities, correlations for sea lice resistance were lower than correlations for body weight.

**Figure S4.**
